# Supplementary material
Source: Springer Nature journal article supplement (https://www.springermedizin.de/resource/supplementary/12936_2010_1366_MOESM5_ESM.pdf/9549612)
Supplement: MOESM5 [file 9549612]

|                                | 2003 | 2004 | 2005        | 2006        | 2007        | 2008        | 2009        |
|--------------------------------|------|------|-------------|-------------|-------------|-------------|-------------|
| PLoS Pathogens                 | 0    | 0    | 4.25        | 6.05        | 9.33        | 9.12        | 8.97        |
| J Infect Dis                   | 4.94 | 4.94 | 4.37        | 5.36        | 6.03        | 5.68        | 5.86        |
| Antimicrob Agents<br>Chemother | 4.24 | 4.21 | 2.82        | 4.15        | 4.39        | 4.71        | 4.8         |
| PLoS Neglected Diseases        | 0    | 0    | 0           | 0           | 0           | 4.71        | 4.69        |
| PLoS One                       | 0    | 0    | 0           | 0           | 0           | 0           | 4.35        |
| Trends Parasitol               | 6.78 | 5.49 | 2.02        | 4.9         | 4.96        | 4.69        | 4.29        |
| Infect Immun                   | 3.87 | 4.03 | 3.93        | 4           | 3.99        | 3.98        | 4.22        |
| Int J Parasitol                | 2.88 | 3.09 | 1.22        | 3.33        | 3.39        | 3.75        | 3.81        |
| Vaccine                        | 3    | 2.82 | 0           | 3.15        | 3.37        | 3.29        | 3.61        |
| <b>Malaria Journal</b>         | 0    | 0    | <b>2.13</b> | <b>2.74</b> | <b>2.47</b> | <b>2.91</b> | <b>3.00</b> |
| Am J Trop Med Hyg              | 2.1  | 2.01 | 2.48        | 2.54        | 2.67        | 2.45        | 2.79        |
| Trans R Soc Trop Med Hyg       | 2.11 | 1.74 | 1.66        | 2.03        | 2.13        | 2.06        | 2.55        |
| Trop Med Int Health            | 2.15 | 1.96 | 2.58        | 2.59        | 2.46        | 2.31        | 2.32        |
| Acta Trop                      | 1.33 | 1.95 | 1.8         | 2.21        | 2.00        | 1.7         | 2.21        |
| Ann Trop Med Parasit           | 1.01 | 1.16 | 4.95        | 1.18        | 1.34        | 1.68        | 1.38        |
